# Supplementary material
Source: PubMed Central journal article supplement (PMC8579034)
Supplement: NIHMS1751179-supplement-Supplement1.pdf [file NIHMS1751179-supplement-Supplement1.pdf]

## Supplementary Appendix

This appendix has been provided by the authors to give readers additional information about their work.

Supplement to: Gaudinski MR, Berkowitz NM, Idris AH, et al. A monoclonal antibody for malaria prevention. *N Engl J Med* 2021;385:803-14. DOI: 10.1056/NEJMoa2034031

# A MONOCLONAL ANTIBODY FOR MALARIA PREVENTION

## Supplementary Appendix

### Table of Contents

|                                                                                                    |          |
|----------------------------------------------------------------------------------------------------|----------|
| <b>VRC 612 STUDY TEAM</b> .....                                                                    | <b>2</b> |
| <b>AUTHOR CONTRIBUTIONS</b> .....                                                                  | <b>3</b> |
| <b>SUPPLEMENTAL METHODS:</b> .....                                                                 | <b>4</b> |
| QUANTIFICATION OF CIS43LS SERUM CONCENTRATIONS.....                                                | 4        |
| POPULATION PHARMACOKINETICS (PK) ANALYSIS.....                                                     | 5        |
| JUNCTIONAL EPITOPE SEQUENCE CONSERVATION.....                                                      | 5        |
| <b>REFERENCES:</b> .....                                                                           | <b>6</b> |
| <b>SUPPLEMENTAL FIGURES:</b> .....                                                                 | <b>7</b> |
| FIGURE S1. CIS43LS SERUM CONCENTRATIONS FOR PART A AND PART B PARTICIPANTS.....                    | 7        |
| FIGURE S2. PK MODELLING FOR IV ADMINISTRATION OF CIS43LS WITH 95% PREDICTION INTERVALS.....        | 8        |
| <b>SUPPLEMENTAL TABLES:</b> .....                                                                  | <b>9</b> |
| TABLE S1. BASELINE DEMOGRAPHIC CHARACTERISTICS OF VRC 612 STUDY PARTICIPANTS. ....                 | 9        |
| TABLE S2. PHARMACOKINETIC (PK) PARAMETERS OF CIS43LS. ....                                         | 10       |
| TABLE S3. CONTROLLED HUMAN MALARIA INFECTION MOSQUITO SCORE/SALIVARY GLAND RATING AND OUTCOME..... | 11       |
| TABLE S4. SERUM CIS43LS AT TIME OF CHMI. ....                                                      | 12       |

## VRC 612 Study Team

Cynthia Starr Hendel, Allison Beck, Abidemi Ola, Karen Parker, Joseph Casazza, Laura Novik, Pamela Costner, Jennifer Cunningham, Jamie Saunders, William Whalen, Xiaolin Wang, Anita Arthur, Aba Mensima Eschun, Renunda Hicks, Preeti Apte, Cora Trelles Cartagena, Pernell Williams, La'Shawn Requilman, Galina Yamshchikov, Christian Buettner, Lam Le, Iris Pittman, Stephanie Taylor, Thuy Nguyen, Olga Vasilenko, Shinyi Telscher, Zana Blaku, Jihyun Esther Jeon, Colin Tran, Justine Jones, Morgan Anderson, Carmencita Graves, Charla Andrews, Brenda Larkin, Kathy Zephir, Peter Crompton, Douglas Rosing, John Misasi; WRAIR Study Team: Megan Dowler, Tatyana Savransky, Ying Jin-Clark, Leah Perazzo, and the Vaccine Research Center Vaccine Production Program (VPP): Gabriela Albright, Nadia Amharref, Kandace Atallah, Sashikanth Banappagari, Niutish Bastani, Daniel Blackstock, Bobby Boonyaratanakornkit, Elizabeth Carey, Adam Charlton, Rajoshi Chaudhuri, Alegria M. Caringal, Mingzhong Chen, Peifeng Chen, Wei Cheng, Daniel Gowetski, Krishana Gulla, Erica Hastings, Joe Horwitz, Vera Ivleva, Dan Kordella, Lisa A. Kuelto, Sara Lagler, Matt Le, James Lee, Paula Lei, Yile Li, Attila Nagy, Aakash Patel, Peyi Runsewe, Will Shadrack, Shamitha Shetty, Hairong Wang, Calvin Webber, Farah Vejzagic, and Yoo-Jung Yang.

## Author Contributions

|                                                                                                                                                                                                                                                                                                                                                                                                                                                                                                                                                                          |                                                                                                                                                                                                                                                                                                                                                                               |                                                                                                                                                                                                                                                                                                                                                                                                                                                                                                                                                                                                                                                                                                                                                                                                                                                                                                                              |
|--------------------------------------------------------------------------------------------------------------------------------------------------------------------------------------------------------------------------------------------------------------------------------------------------------------------------------------------------------------------------------------------------------------------------------------------------------------------------------------------------------------------------------------------------------------------------|-------------------------------------------------------------------------------------------------------------------------------------------------------------------------------------------------------------------------------------------------------------------------------------------------------------------------------------------------------------------------------|------------------------------------------------------------------------------------------------------------------------------------------------------------------------------------------------------------------------------------------------------------------------------------------------------------------------------------------------------------------------------------------------------------------------------------------------------------------------------------------------------------------------------------------------------------------------------------------------------------------------------------------------------------------------------------------------------------------------------------------------------------------------------------------------------------------------------------------------------------------------------------------------------------------------------|
| <p><b>Designed the study:</b><br/>         Robert A. Seder<br/>         Martin R. Gaudinski<br/>         Julie E. Ledgerwood<br/>         Nina M. Berkowitz<br/>         Grace L. Chen<br/>         Kevin Carlton<br/>         Jason G. Gall<br/>         Sandra Vazquez<br/>         Somia Hickman<br/>         Diane Wycuff<br/>         Judy A. Stein<br/>         Christopher Case<br/>         Neville K. Kisalu<br/>         Azza H. Idris<br/>         Edmund V. Capparelli<br/>         Zonghui Hu,<br/>         Brian P. Evans<br/>         John R. Mascola</p> | <p><b>Gathered the data:</b><br/>         Martin R. Gaudinski<br/>         LaSonji A. Holman<br/>         Floreliz Mendoza<br/>         Ingelise J. Gordon<br/>         Andrezza Campos Chagas<br/>         Sarah O’Connell<br/>         Manjula Basappa<br/>         Naomi Douek<br/>         Sandeep R. Narpala<br/>         Alicia T. Widge<br/>         Renunda Hicks</p> | <p><b>Analyzed the data:</b><br/>         Martin R. Gaudinski<br/>         Nina M. Berkowitz<br/>         Azza H. Idris<br/>         Emily E. Coates<br/>         LaSonji A. Holman<br/>         Floreliz Mendoza<br/>         Ingelise J. Gordon<br/>         Sarah H. Plummer<br/>         Olga Trofymenko<br/>         Zonghui Hu<br/>         Andrezza Campos Chagas<br/>         Sarah O’Connell<br/>         Manjula Basappa<br/>         Naomi Douek<br/>         Sandeep R. Narpala<br/>         Alicia T. Widge<br/>         Seemal F. Awan<br/>         Richard L. Wu<br/>         Somia Hickman<br/>         Sandra Vazquez<br/>         Britta Flach<br/>         Joseph R. Francica<br/>         Barbara J. Flynn<br/>         Neville K. Kisalu<br/>         Edmund V. Capparelli<br/>         Adrian McDermott<br/>         John R. Mascola<br/>         Julie E. Ledgerwood<br/>         Robert A. Seder</p> |
| <p><b>Vouches for the data and analysis:</b></p> <p><b>All authors</b></p>                                                                                                                                                                                                                                                                                                                                                                                                                                                                                               | <p><b>Who wrote the paper:</b><br/>         Martin R. Gaudinski<br/>         Nina M. Berkowitz<br/>         Azza H. Idris<br/>         Emily E. Coates<br/>         Sandeep R. Narpala<br/>         Zonghui Hu<br/>         Edmund V. Capparelli<br/>         Robert A. Seder</p>                                                                                             | <p><b>Decided to Publish the paper:</b><br/>         Robert A. Seder<br/>         Martin R. Gaudinski</p>                                                                                                                                                                                                                                                                                                                                                                                                                                                                                                                                                                                                                                                                                                                                                                                                                    |

## Supplemental Methods:

### Quantification of CIS43LS Serum Concentrations

Serum concentration of CIS43LS was performed on the MSD (Meso Scale Discovery) platform. The anti-idiotypic, anti-ID 1-1, antibody solution diluted in 1X PBS was applied at a concentration of 1 ug/mL to the uncoated MSD 96 well plate surface. Plates were agitated for a brief time to ensure solution was fully coated over well bottom surface. Plates were sealed and placed at 4°C overnight. The next day the plates were washed with wash buffer (1XPBS+ 0.05% Tween-20) then blocked for 1 hour with 5% MSD Blocker A blocking solution. The blocking solution was washed, and reference or test samples in duplicate 2-fold 8-point serial dilutions were applied to the wells and allowed to incubate with shaking for one hour. Plates were washed to remove unbound sample. Sulfo-tag labeled anti human IgG detection antibody at a concentration of 2 ug/mL was applied to the wells and allowed to associate with complexed 1-1 – CIS43LS within the assay wells. Plates were washed to remove unbound detection antibody. A read solution containing ECL substrate was applied to the wells, and the plates were entered into the MSD Sector instrument. A current was applied to the plates and areas of well surface which form a full 1-1 – CIS43LS -anti human IgG-SulfoTag complex emitted light in the presence of the ECL substrate. The MSD Sector instrument quantitates the amount of light emitted and reports this ECL unit response as a result for each sample and standard of the plate. The amount of CIS43LS sandwiched by the Anti ID and Anti Human IgG antibodies is directly proportional to the concentration of reactive CIS43LS protein in the sample wells. Assuming the standard and test material are biologically similar, the responses generated from both materials can be compared to quantitate the concentration of CIS43LS in test samples. All data analysis was performed using Microsoft Excel and GraphPad Prism.

## Population Pharmacokinetics (PK) Analysis

A population PK analysis was performed using a two-compartment model with first order SC absorption (ADVAN4 TRANS4) and the program in NONMEM 7.3 (ICON, Dublin). A bootstrap evaluation with 1000 replicates was used to generate confidence intervals of the population PK parameters. In addition to defining population PK parameters, this analysis was used to create a predictive model which may be useful for clinical design of futures studies. Allometric scaling was utilized to normalize PK parameters to 70kg (e.g. CL and Q -  $(WT/70)^{0.85}$ ; Vss and Vc -  $(WT/70)^{1.0}$ )<sup>1</sup>. Only dose level following IV administration was formally assessed as a potential covariate for PK parameters due to the relatively small number of study participants. The final population PK model was used to simulate 1000 virtual participants and generate prediction intervals following IV administration. These prediction intervals were compared to dose adjusted observed concentrations from the study participants (observed concentration x adjustment dose/actual mg/kg dose).

## Junctional Epitope Sequence Conservation

Of the 6500 sequences of PfCSP, there were 8 alleles that varied in the junctional epitope (NPDPNANPNVDPNAN) of the 3D7 Pf strain (see table below). Six of the 8 variants occur in Asia which is geographic region with limited transmission of *P. falciparum*. Moreover, the mutations exist in isolates from Africa, are not critical contact sites, based on binding to CIS43LS using alanine scanning mutagenesis and structural analysis of CIS43 binding to the junctional epitope<sup>2</sup>.

| Position            | 101              | 102 | 103 | 104 | 105 | 106 | 107 | 108 | 109 | 110 | 111 | 112 | 113 | 114 | 115 | 116 |          |             |          |
|---------------------|------------------|-----|-----|-----|-----|-----|-----|-----|-----|-----|-----|-----|-----|-----|-----|-----|----------|-------------|----------|
| Junctional Sequence | N                | P   | D   | P   | N   | A   | N   | P   | N   | V   | D   | P   | N   | A   | N   | P   |          |             |          |
| Polymorphism        | Allele Frequency |     |     |     |     |     |     |     |     |     |     |     |     |     |     |     | Location |             |          |
| D111V               |                  |     |     |     |     |     |     |     |     |     | V   |     |     |     |     |     | 1/161    | 0.006211185 | India    |
| 103DP104 > 103VL104 |                  |     | V   | L   |     |     |     |     |     |     |     |     |     |     |     |     | 1/161    | 0.006211185 | India    |
| P102A               |                  | A   |     |     |     |     |     |     |     |     |     |     |     |     |     |     | 1/161    | 0.006211185 | India    |
| N105P               |                  |     |     |     | P   |     |     |     |     |     |     |     |     |     |     |     | 1/161    | 0.006211185 | India    |
| N105H               |                  |     |     |     | H   |     |     |     |     |     |     |     |     |     |     |     | 1/161    | 0.006211185 | India    |
| V110A <sup>®</sup>  |                  |     |     |     |     |     |     |     |     | A   |     |     |     |     |     |     | 1/5258   | 0.000190186 | Ghana    |
| D111N <sup>®</sup>  |                  |     |     |     |     |     |     |     |     |     | N   |     |     |     |     |     | 1/5260   | 0.000190114 | Ghana    |
| P102V <sup>✓</sup>  |                  | V   |     |     |     |     |     |     |     |     |     |     |     |     |     |     | 1/5264   | 0.00018997  | Thailand |

Adapted from Supplementary Figure 10 (Kisalu, NK et al., Nat Med, 2018)<sup>2</sup>

## References:

1. Deng R, Iyer S, Theil FP, Mortensen DL, Fielder PJ, Prabhu S. Projecting human pharmacokinetics of therapeutic antibodies from nonclinical data: what have we learned? *MAbs* 2011;3:61-6.
2. Kisalu NK, Idris AH, Weidle C, et al. A human monoclonal antibody prevents malaria infection by targeting a new site of vulnerability on the parasite. *Nat Med* 2018;24:408-16.

Supplemental Figures:

Figure S1. CIS43LS Serum Concentrations for Part A and Part B Participants.

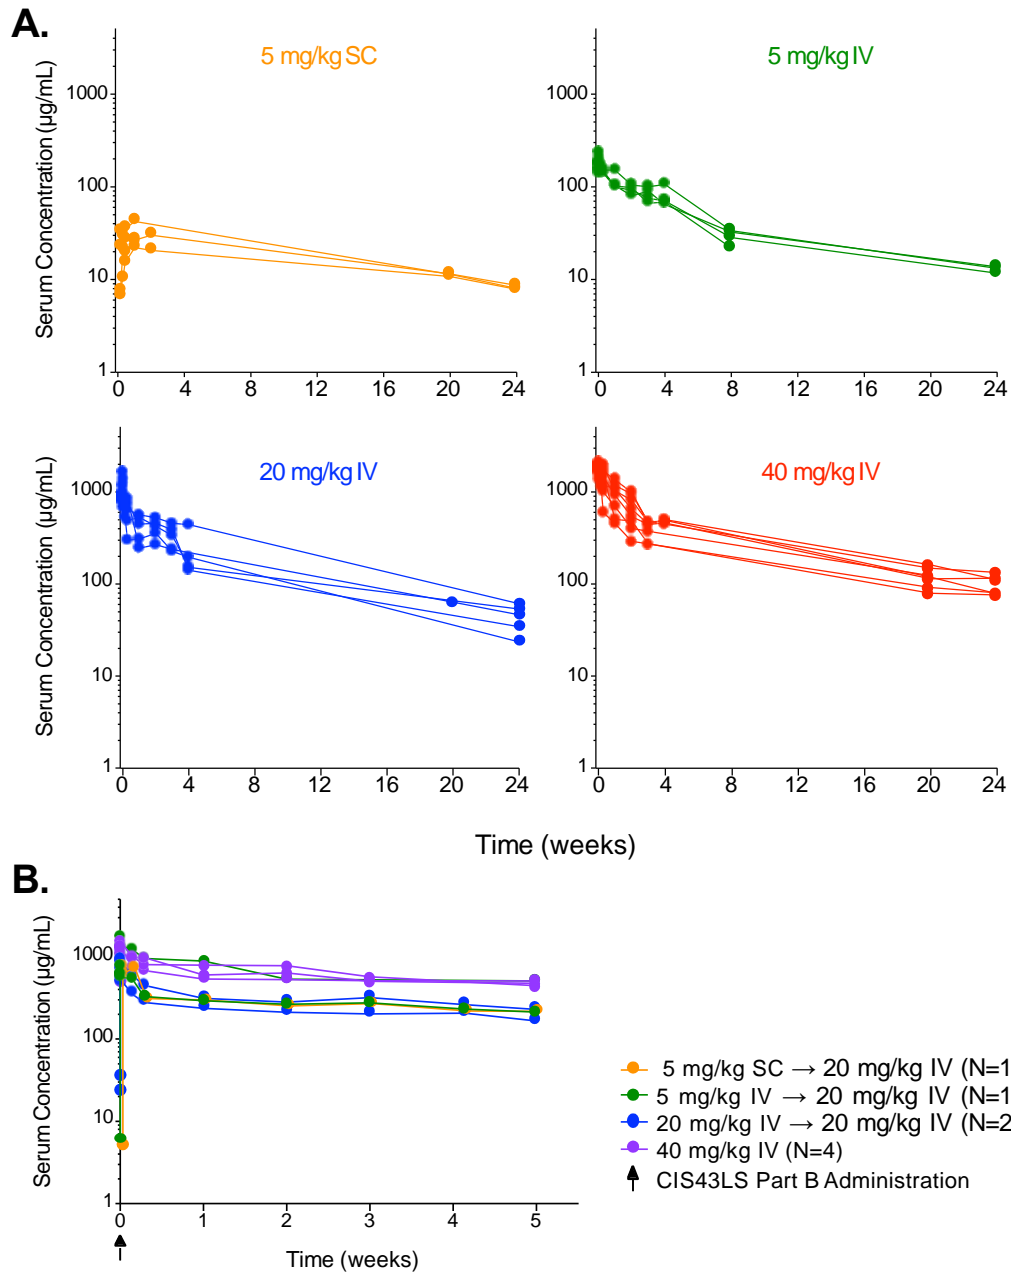

**Figure S1. CIS43LS Serum Concentrations for Part A and Part B Participants.**

**A.** Serum concentrations of CIS43LS for all Part A participants by dose group following a single administration. **B.** Serum concentrations of CIS43LS for Part B participants which includes new participants who received 40 mg/kg IV (purple) and four Part A participants who received a second dose of 20 mg/kg IV (blue, green, orange). Dose, route, and group size (N) are specified in the legend.



Figure S2. PK Modelling for IV Administration of CIS43LS with 95% Prediction Intervals

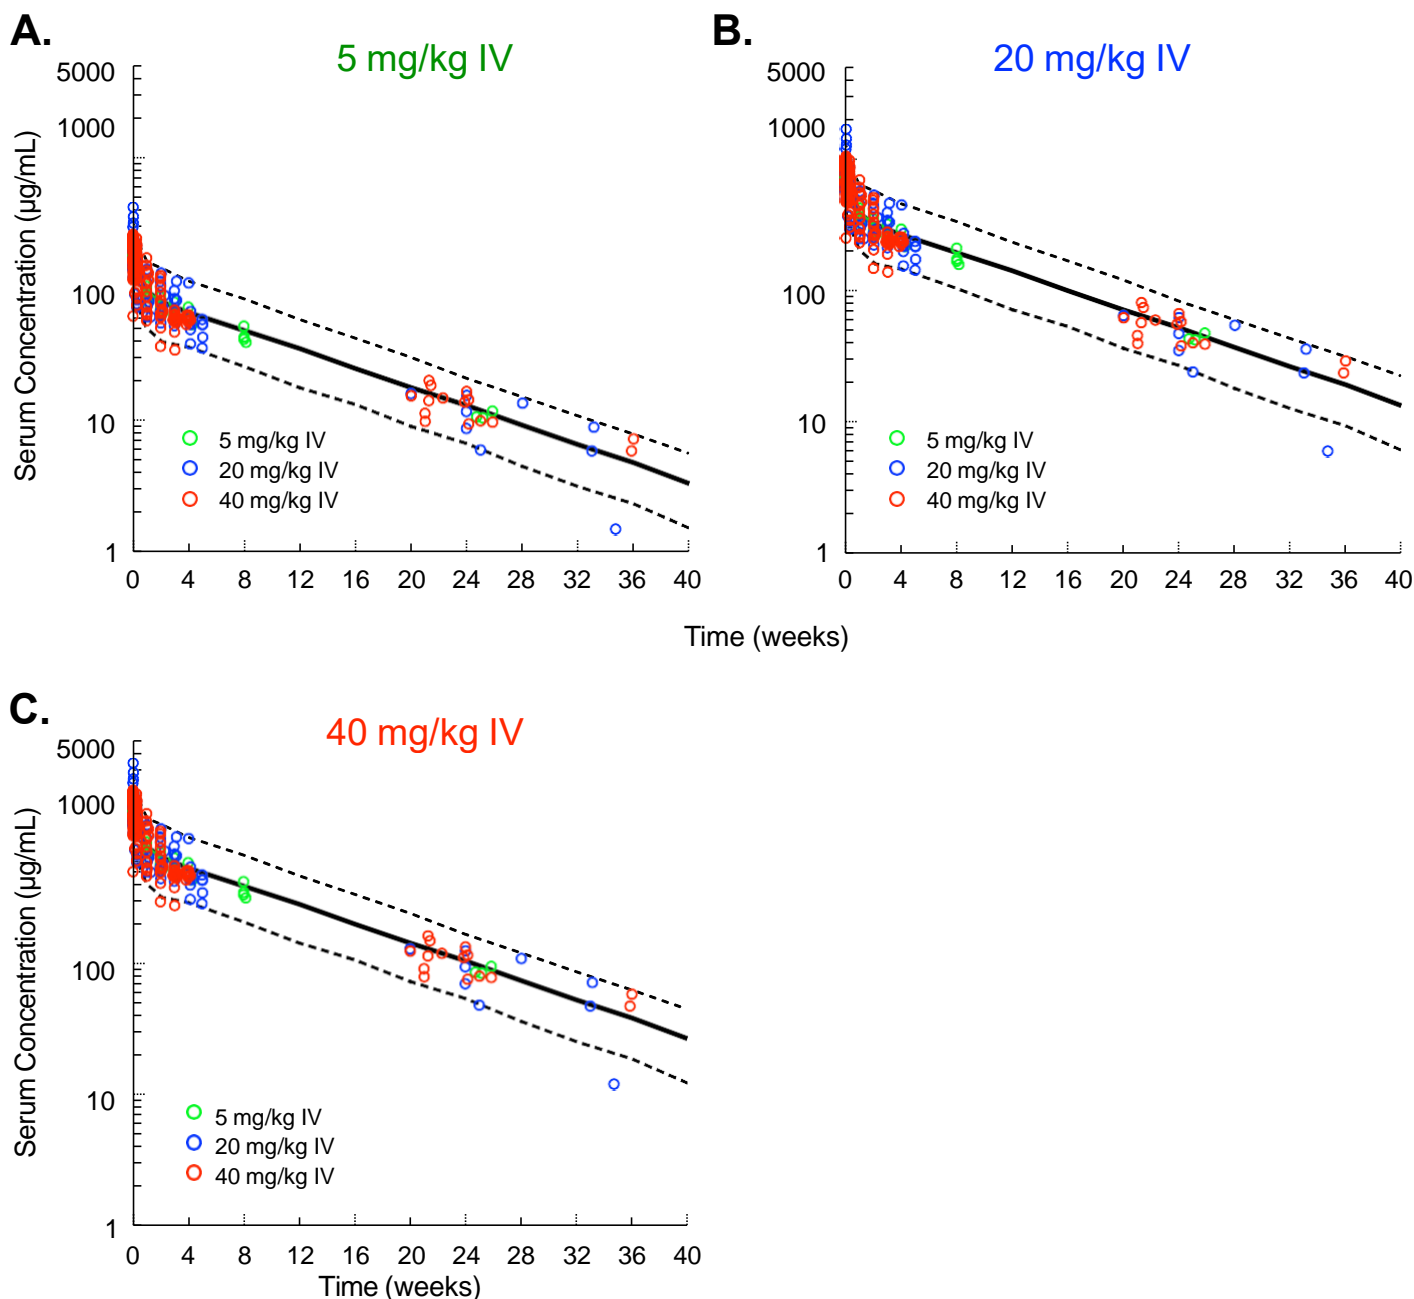

**Figure S2. PK Modelling for IV Administration of CIS43LS with 95% Prediction Intervals.** Predicted median CIS43LS concentrations are depicted (solid lines) with 95% prediction intervals (5th - 95th percentiles, dashed black lines) based on Monte Carlo simulations using the population pharmacokinetic model following IV doses of 5 mg/kg (A), 20 mg/kg (B), and 40 mg/kg (C). Observed CIS43LS concentrations (normalized for each of the respective doses) are overlaid for comparison.

## Supplemental Tables:

Table S1. Baseline Demographic Characteristics of VRC 612 Study Participants.

| <b>TABLE S1. BASELINE DEMOGRAPHIC CHARACTERISTICS OF VRC 612 STUDY PARTICIPANTS.</b> |                                  |                  |                  |                    |                    |                       |                       |
|--------------------------------------------------------------------------------------|----------------------------------|------------------|------------------|--------------------|--------------------|-----------------------|-----------------------|
| CATEGORY                                                                             | SUBCATEGORY                      | 5 mg/kg SC (N=4) | 5 mg/kg IV (N=4) | 20 mg/kg IV (N=9)* | 40 mg/kg IV (N=12) | PART A CONTROLS (N=8) | PART B CONTROLS (N=8) |
| <b>GENDER no.(%)</b>                                                                 | <b>MALE</b>                      | 2 (50.0%)        | 2 (50.0%)        | 6 (66.7%)          | 6 (50.0%)          | 1 (12.5%)             | 2 (25.0%)             |
|                                                                                      | <b>FEMALE</b>                    | 2 (50.0%)        | 2 (50.0%)        | 3 (33.3%)          | 6 (50.0%)          | 7 (87.5%)             | 6 (75.0%)             |
| <b>AGE† no.(%)</b>                                                                   | <b>18-20</b>                     | 0 (0.0%)         | 1 (25.0%)        | 1 (11.1%)          | 0 (0.0%)           | 0 (0.0%)              | 0 (0.0%)              |
|                                                                                      | <b>21-30</b>                     | 4 (100.0%)       | 3 (75.0%)        | 6 (66.7%)          | 9 (75.0%)          | 5 (62.5%)             | 5 (62.5%)             |
|                                                                                      | <b>31-40</b>                     | 0 (0.0%)         | 0 (0.0%)         | 2 (22.2%)          | 2 (16.7%)          | 2 (25.0%)             | 3 (37.5%)             |
|                                                                                      | <b>41-50</b>                     | 0 (0.0%)         | 0 (0.0%)         | 0 (0.0%)           | 1 (8.3%)           | 1 (12.5%)             | 0 (0.0%)              |
|                                                                                      | <b>MEAN (SD)</b>                 | 23.5 (3.7)       | 26.5 (5.1)       | 26.8 (5.5)         | 29.8 (8.1)         | 30.5 (8.9)            | 30.1 (4.5)            |
|                                                                                      | <b>RANGE</b>                     | [21.0, 29.0]     | [19.0, 30.0]     | [20.0, 37.0]       | [22.0, 50.0]       | [23.0, 50.0]          | [26.0, 38.0]          |
|                                                                                      | <b>RACE no.(%)</b>               | <b>ASIAN</b>     | 2 (50.0%)        | 0 (0.0%)           | 3 (33.3%)          | 3 (25.0%)             | 1 (12.5%)             |
|                                                                                      | <b>BLACK OR AFRICAN AMERICAN</b> | 1 (25.0%)        | 0 (0.0%)         | 1 (11.1%)          | 0 (0.0%)           | 0 (0.0%)              | 1 (12.5%)             |
|                                                                                      | <b>WHITE</b>                     | 1 (25.0%)        | 4(100.0%)        | 5 (55.6%)          | 9 (75.0%)          | 6 (75.0%)             | 3 (37.5%)             |
|                                                                                      | <b>MULTIRACIAL</b>               | 0 (0.0%)         | 0 (0.0%)         | 0 (0.0%)           | 0 (0.0%)           | 1 (12.5%)             | 3 (37.5%)             |
| <b>ETHNICITY no.(%)</b>                                                              | <b>NON-HISPANIC/LATINO</b>       | 4 (100.0%)       | 3 (75.0%)        | 8 (88.9%)          | 12 (100.0%)        | 7 (87.5%)             | 7 (87.5%)             |
|                                                                                      | <b>HISPANIC/LATINO</b>           | 0 (0.0%)         | 1 (25.0%)        | 1 (11.1%)          | 0 (0.0%)           | 1 (12.5%)             | 1 (12.5%)             |
| <b>WEIGHT (kg)</b>                                                                   | <b>MEAN (SD)</b>                 | 70.5 (15.1)      | 67.1 (8.8)       | 69.7 (14.8)        | 72.6 (13.9)        | 67.0 (15.0)           | 74.9 (16.0)           |
|                                                                                      | <b>RANGE</b>                     | [48.8, 82.4]     | [60.6, 80.0]     | [48.8, 95.9]       | [53.9, 92.9]       | [49.8, 92.0]          | [54.7, 102.9]         |
| <b>EDUCATION no.(%)</b>                                                              | <b>COLLEGE/UNIVERSITY</b>        | 4 (100.0%)       | 3 (75.0%)        | 7 (77.8%)          | 5 (41.7%)          | 2 (25.0%)             | 3 (37.5%)             |
|                                                                                      | <b>ADVANCED DEGREE</b>           | 0 (0.0%)         | 1 (25.0%)        | 2 (22.2%)          | 7 (58.3%)          | 6 (75.0%)             | 5 (62.5%)             |
| *Includes 4 participants from Part A who received CIS43LS 20 mg/kg IV in Part B      |                                  |                  |                  |                    |                    |                       |                       |
| † Age represents age at initial enrollment day.                                      |                                  |                  |                  |                    |                    |                       |                       |

Table S2. Pharmacokinetic (PK) Parameters of CIS43LS.

| <b>TABLE S2. PHARMACOKINETIC (PK) PARAMETERS OF CIS43LS.</b> |                                |                               |                       |                                                                   |                         |
|--------------------------------------------------------------|--------------------------------|-------------------------------|-----------------------|-------------------------------------------------------------------|-------------------------|
| <b>PK PARAMETERS BY DOSE GROUP</b>                           |                                |                               |                       |                                                                   |                         |
| <b>DOSE GROUP</b>                                            | <b>C<sub>max</sub> (µg/mL)</b> | <b>T<sub>max</sub> (Days)</b> | <b>C<sub>7D</sub></b> | <b>C<sub>4WK</sub></b>                                            | <b>C<sub>24WK</sub></b> |
|                                                              | <b>Mean (SD, N)</b>            |                               |                       |                                                                   |                         |
| <b>5 mg/kg SC</b>                                            | ---*                           | ---*                          | 29.4 (9.3, 4)         | ---*                                                              | 8.0 (0.4, 3)            |
| <b>5 mg/kg IV</b>                                            | 198.4 (28.2, 4)                | 0.10 (0.08)                   | 114.3 (25.2, 4)       | 77.3 (19.5, 4)                                                    | 12.8 (1.0, 3)           |
| <b>20 mg/kg IV</b>                                           | 934.6 (292.6, 9)               | 0.07 (0.07)                   | 356.1 (118.6, 9)      | 230.1 (2.5, 8)                                                    | 43.5 (14.9, 5)          |
| <b>40 mg/kg IV</b>                                           | 1764.4 (259.6, 12)             | 0.25 (0.5)                    | 825.3 (293.1, 12)     | 473.2 (22.8, 5)                                                   | 96.8 (23.8, 6)          |
| <b>PK PARAMETERS FOR ALL GROUPS (N=29)</b>                   |                                |                               |                       |                                                                   |                         |
| <b>PK PARAMETER</b>                                          | <b>VALUE</b>                   | <b>BOOTSTRAP (BS) MEDIAN</b>  |                       | <b>BS 5<sup>th</sup> – 95<sup>th</sup> PERCENTILE<sup>†</sup></b> |                         |
| <b>T<sub>1/2b</sub> (days)</b>                               | 56                             | 58.9                          |                       | 51.9 - 77.0                                                       |                         |
| <b>CL (mL/day)</b>                                           | 44.2                           | 43.4                          |                       | 39.6 - 47.9                                                       |                         |
| <b>V<sub>dss</sub> (L)</b>                                   | 3.45                           | 3.54                          |                       | 3.25 - 4.13                                                       |                         |

C<sub>max</sub> = maximum serum concentration; T<sub>max</sub> = time to maximum serum concentration; C<sub>7D</sub>, C<sub>4WK</sub>, C<sub>24WK</sub> = concentration on day 7, weeks 4 and 24, respectively.  
 \*Could not be determined due to truncated sample collections  
 T<sub>1/2β</sub> = beta half-life; CL = clearance; V<sub>dss</sub> = volume of distribution  
 † Bootstrap 90% confidence intervals for population PK parameters

Table S3. Controlled Human Malaria Infection Mosquito Score/Salivary Gland Rating and Outcome.

| <b>TABLE S3. CONTROLLED HUMAN MALARIA INFECTION MOSQUITO SCORE/SALIVARY GLAND RATING AND OUTCOME.</b> |                    |             |                  |       |                   |                        |                          |                      |
|-------------------------------------------------------------------------------------------------------|--------------------|-------------|------------------|-------|-------------------|------------------------|--------------------------|----------------------|
| SUBJECT                                                                                               | CIS43LS Dose/ROUTE |             | MOSQUITO SCORING |       |                   | SALIVARY GLAND RATING* |                          | DAY OF POSITIVE PCR‡ |
|                                                                                                       | Part A             | Part B      | Total # Used     | # Fed | Qualifying Bites† | Average                | Raw Ratings              |                      |
| 1                                                                                                     | 5 mg/kg IV         | 20 mg/kg IV | 6                | 6     | 5                 | 3.4                    | 0,3,4,4,3,3              | Negative             |
| 2                                                                                                     | 5 mg/kg SC         | 20 mg/kg IV | 9                | 8     | 5                 | 3.2                    | 0,3,3,0,NF,0,3,4,3       | Negative             |
| 3                                                                                                     | 20 mg/kg IV        | 20 mg/kg IV | 9                | 6     | 5                 | 2.6                    | NF,3,3,3,0,NF,2,NF,2     | Negative             |
| 4                                                                                                     | 20 mg/kg IV        | 20 mg/kg IV | 10               | 9     | 5                 | 2.6                    | NF,2,3,0,0,2,0,0,2,4     | Negative             |
| 5                                                                                                     | 40 mg/kg IV        | ---         | 12               | 11    | 5                 | 2.2                    | NF,2,1,0,0,0,0,2,2,2,3   | Negative             |
| 6                                                                                                     | 40 mg/kg IV        | ---         | 9                | 6     | 5                 | 2.8                    | NF,NF,NF,2,3,3,2,0,4     | Negative             |
| 7                                                                                                     | ---                | 40 mg/kg IV | 7                | 7     | 5                 | 3.2                    | 4,4,3,0,0,3,2            | Negative             |
| 8                                                                                                     | ---                | 40 mg/kg IV | 7                | 5     | 5                 | 3.2                    | 4,3,2,NF,NF,4,3          | Negative             |
| 9                                                                                                     | ---                | 40 mg/kg IV | 12               | 9     | 5                 | 3.4                    | NF,NF,NF,4,3,0,0,0,4,3,3 | Negative             |
| 10                                                                                                    | Control            |             | 8                | 6     | 5                 | 3.4                    | 2,4,0,NF,NF,4,3,4        | 9                    |
| 11                                                                                                    | Control            |             | 11               | 9     | 5                 | 3                      | 3,2,0,0,NF,2,0,NF,4,0,4  | Negative             |
| 12                                                                                                    | Control            |             | 7                | 5     | 5                 | 2.8                    | 2,3,3,NF,NF,3,3          | 9                    |
| 13                                                                                                    | Control            |             | 6                | 6     | 5                 | 3                      | 4,2,3,3,0,4              | 8                    |
| 14                                                                                                    | Control            |             | 7                | 6     | 5                 | 3.2                    | 4,3,2,0,NF,3,4           | 9                    |
| 15                                                                                                    | Control            |             | 8                | 7     | 5                 | 3.4                    | NF,0,2,3,0,4,4,4         | 8                    |

CHMI using *Anopheles Stephensi* mosquitoes infected with *Plasmodium falciparum* -3D7 strain.

\*Salivary gland rating is based on number of sporozoites (spz) observed after dissection. NF = mosquito did not feed, 0 = no spz observed, 1 = 1-10 spz, 2 = 11-100 spz, 3 = 101 – 1000 spz, 4 > 1000 spz.

† A qualifying bite was defined as a bite with a mosquito bearing a salivary gland rating of 2 or greater. All challenged subjects were required to have 5 qualifying bites.

‡ Volunteers were treated with atovaquone/proguanil on day of positive PCR, or at day 21 if untreated by that time point.

Table S4. Serum CIS43LS at Time of CHMI.

| <b>TABLE S4. SERUM CIS43LS AT TIME OF CHMI.</b> |                    |             |                                                  |                                              |
|-------------------------------------------------|--------------------|-------------|--------------------------------------------------|----------------------------------------------|
| SUBJECT                                         | CIS43LS Dose/Route |             | CIS43LS SERUM<br>CONCENTRATION @ CHMI<br>(µg/mL) | TIME FROM LAST<br>ADMINISTRATION†<br>(Weeks) |
|                                                 | PART A             | PART B      |                                                  |                                              |
| 1                                               | 5 mg/kg IV         | 20 mg/kg IV | 210.1                                            | 5.1                                          |
| 2                                               | 5 mg/kg SC         | 20 mg/kg IV | 217.4                                            | 5.1                                          |
| 3                                               | 20 mg/kg IV        | 20 mg/kg IV | 230.7                                            | 5.0                                          |
| 4                                               | 20 mg/kg IV        | 20 mg/kg IV | 167.7                                            | 5.1                                          |
| 5                                               | 40 mg/kg IV        | ---         | 57.0*                                            | 36.1                                         |
| 6                                               | 40 mg/kg IV        | ---         | 46.2*                                            | 36.0                                         |
| 7                                               | ---                | 40 mg/kg IV | 453.7                                            | 4.1                                          |
| 8                                               | ---                | 40 mg/kg IV | 422.3                                            | 4.0                                          |
| 9                                               | ---                | 40 mg/kg IV | 493.8                                            | 4.0                                          |

\*Serum concentration in Part A participants who received a single CIS43LS administration prior to CHMI.  
†Time span from last CIS43LS administration until time of CHMI.
